# Supplementary material for: Age-varying associations between physical activity and psychological outcomes among rural cancer survivors
Source: Springer Nature journal article supplement (doi:10.1007/s10865-020-00187-6), 2020-10-12

**Age-varying associations between physical activity and psychological outcomes among rural cancer survivors**

Nishat Bhuiyan, MS, Ashley N. Linden-Carmichael, PhD, Stephanie T. Lanza, PhD, Kathryn H. Schmitz, PhD, Scherezade K. Mama, DrPH

**Figure 3a-b:** Time-varying effect models displaying age-varying effects of (a) moderate physical activity and (b) total physical activity on symptoms of depression across ages 22 to 93.

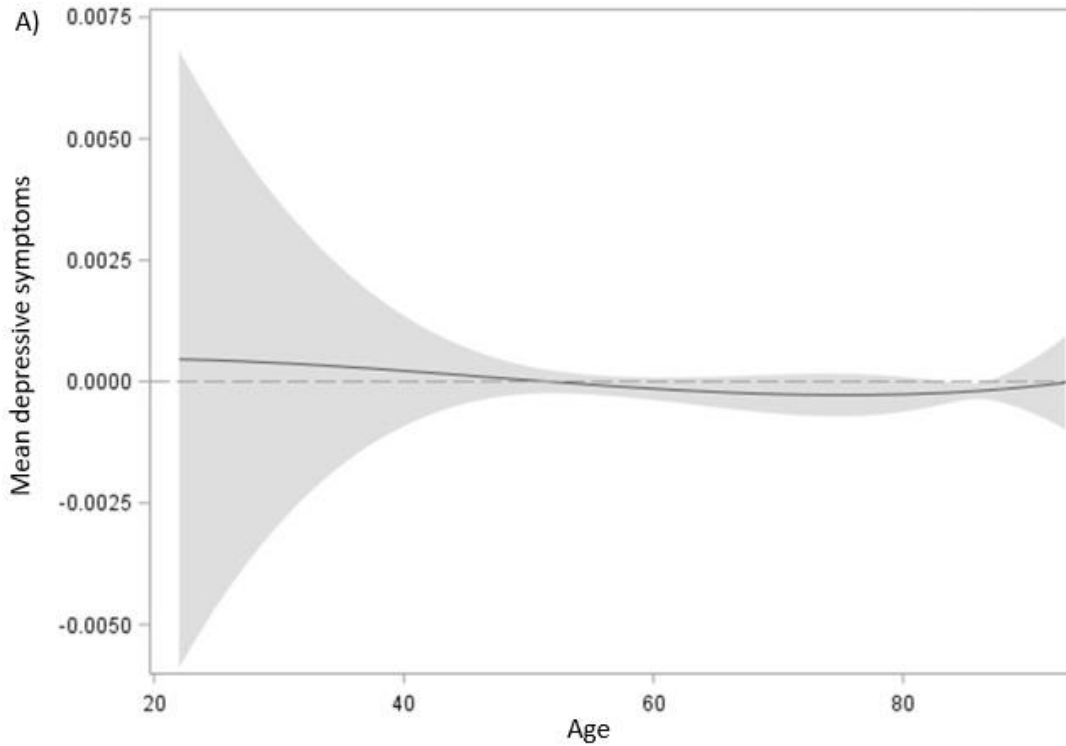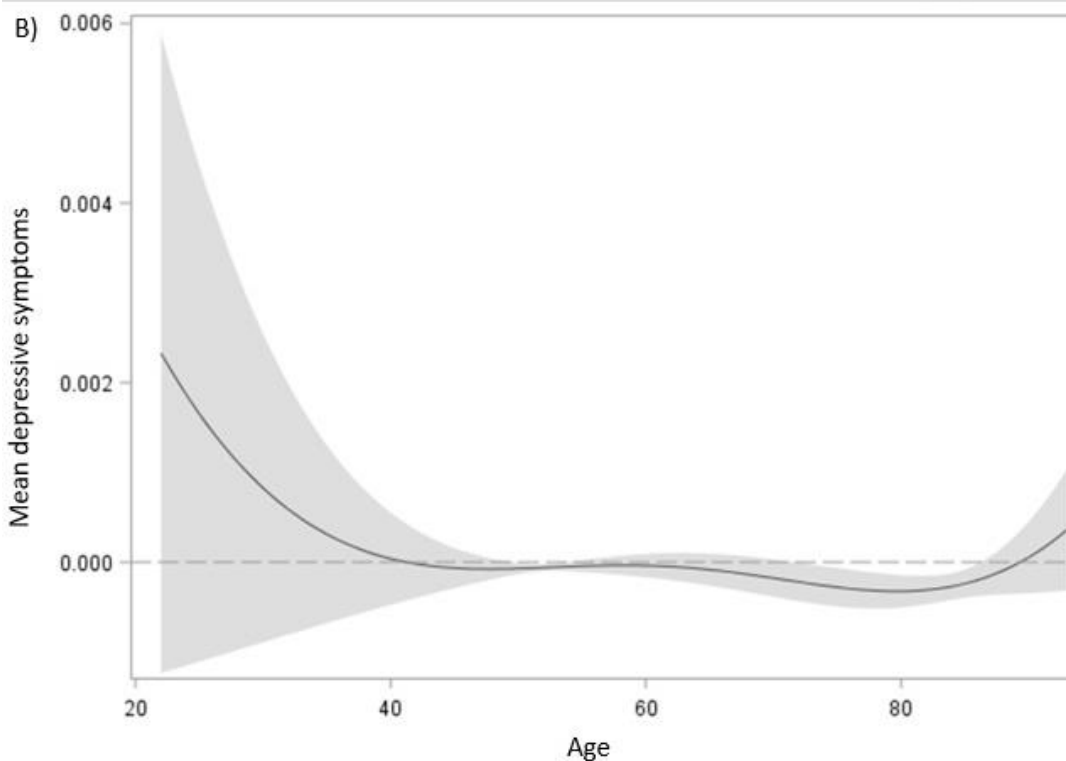

**Figure 4a-b:** Time-varying effect models displaying age-varying effects of (a) moderate physical activity and (b) total physical activity on symptoms of anxiety across ages 22 to 93.

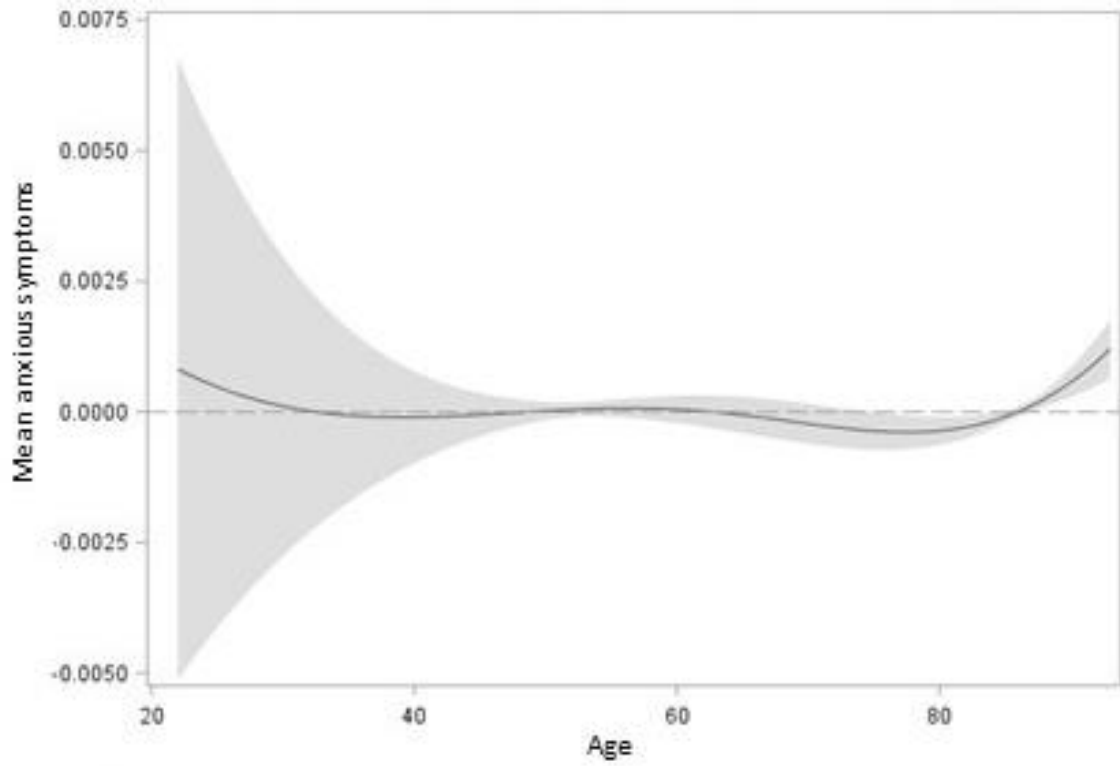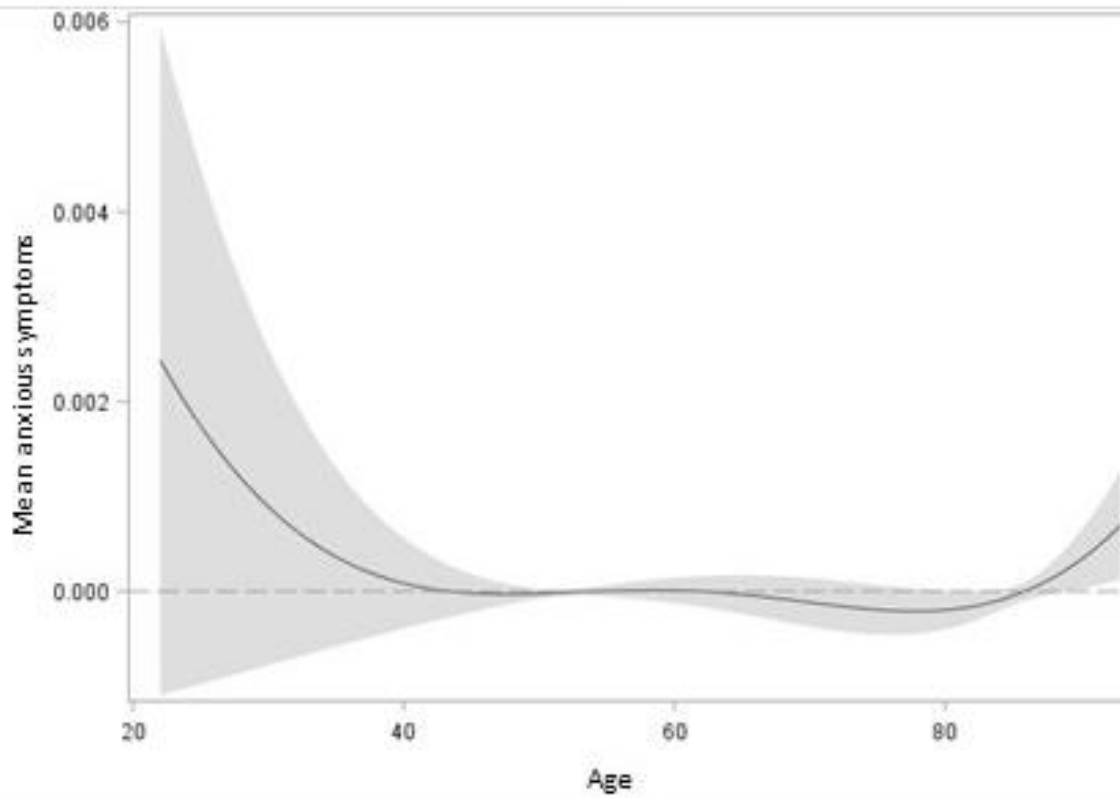

Supplement: 10865_2020_187_MOESM1_ESM.pdf [file 10865_2020_187_MOESM1_ESM.pdf]
